# Supplementary material for: Incidence of Firearm Suicide in US Congressional Districts Estimated from County-Level Underlying Cause of Death Reports
Source: Research Square preprint supplement (doi:10.21203/rs.3.rs-98077/v1), 2020-10-30
Supplement: Supplementary file 1 [file b50067d438c29822f61ffd17.xlsx]

## Sheet: 1. Firearm Suicide by District
Firearm Suicide by Congressional District
Source: Everytown analysis of Centers for Disease Control and Prevention. Wide-ranging Online Data for Epidemiologic Research (WONDER) Underlying Cause of Death. 2014-2018.
Contact: kbistline@everytown.org
Last Updated: October 15, 2020
State	Congressional District	First Year	Last Year	Avg. Yearly Firearm Suicides (#)	Firearm Suicide Crude Rate (per 100,000)	Avg. Yearly Suicides (#)	Suicide Crude Rate (per 100,000)	Percent of Suicides by Firearm	Population	Rural-Urban Categorization
Alabama	1	2014	2018	75	10.68	120	17	0.63	706503	Rural-suburban mix
Alabama	2	2014	2018	76	11.21	106	15.55	0.72	680575	Pure rural
Alabama	3	2014	2018	88	12.4	124	17.58	0.71	706705	Pure rural
Alabama	4	2014	2018	89	12.96	130	18.96	0.68	683391	Pure rural
Alabama	5	2014	2018	87	12.14	128	17.89	0.68	714145	Rural-suburban mix
Alabama	6	2014	2018	78	11.03	115	16.31	0.68	703715	Rural-suburban mix
Alabama	7	2014	2018	51	7.65	71	10.67	0.72	669646	Rural-suburban mix
Alaska	At large	2014	2018	115	15.63	189	25.59	0.61	738516	Pure rural
Arizona	1	2014	2018	92	12.23	184	24.46	0.5	753580	Pure rural
Arizona	2	2014	2018	93	12.94	156	21.69	0.6	719924	Dense suburban
Arizona	3	2014	2018	59	7.68	109	14.07	0.55	771436	Dense suburban
Arizona	4	2014	2018	139	18.04	219	28.51	0.63	768077	Rural-suburban mix
Arizona	5	2014	2018	80	10.01	139	17.31	0.58	803186	Dense suburban
Arizona	6	2014	2018	82	10.62	142	18.29	0.58	776729	Dense suburban
Arizona	7	2014	2018	50	6.3	95	11.86	0.53	801173	Urban-suburban mix
Arizona	8	2014	2018	79	10.1	137	17.55	0.58	777804	Dense suburban
Arizona	9	2014	2018	74	9.59	130	16.77	0.57	774776	Urban-suburban mix
Arkansas	1	2014	2018	97	13.38	149	20.59	0.65	722915	Pure rural
Arkansas	2	2014	2018	86	11.28	133	17.49	0.64	760604	Rural-suburban mix
Arkansas	3	2014	2018	81	10.17	145	18.28	0.56	795817	Rural-suburban mix
Arkansas	4	2014	2018	90	12.66	146	20.57	0.62	711335	Pure rural
California	1	2014	2018	84	11.87	155	21.99	0.54	706822	Rural-suburban mix
California	2	2014	2018	54	7.51	133	18.46	0.41	717732	Rural-suburban mix
California	3	2014	2018	51	6.98	112	15.21	0.46	736039	Rural-suburban mix
California	4	2014	2018	64	8.7	130	17.74	0.49	734899	Rural-suburban mix
California	5	2014	2018	39	5.29	97	13.29	0.4	728000	Dense suburban
California	6	2014	2018	35	4.7	90	11.98	0.39	751475	Urban-suburban mix
California	7	2014	2018	44	5.86	108	14.39	0.41	747097	Dense suburban
California	8	2014	2018	44	6.16	92	12.78	0.48	721709	Rural-suburban mix
California	9	2014	2018	29	3.85	77	10.16	0.38	758327	Dense suburban
California	10	2014	2018	32	4.35	80	10.75	0.4	744389	Dense suburban
California	11	2014	2018	27	3.52	78	10.35	0.34	754654	Urban-suburban mix
California	12	2014	2018	14	1.87	82	10.82	0.17	756773	Pure urban
California	13	2014	2018	20	2.65	72	9.59	0.28	754861	Pure urban
California	14	2014	2018	19	2.56	61	8.13	0.32	753548	Urban-suburban mix
California	15	2014	2018	21	2.77	75	9.67	0.29	773841	Urban-suburban mix
California	16	2014	2018	23	3.1	70	9.67	0.32	728535	Dense suburban
California	17	2014	2018	17	2.21	58	7.48	0.3	771459	Pure urban
California	18	2014	2018	27	3.7	77	10.37	0.36	740932	Urban-suburban mix
California	19	2014	2018	17	2.2	55	7.19	0.31	759866	Urban-suburban mix
California	20	2014	2018	32	4.29	83	11.3	0.38	735667	Urban-suburban mix
California	21	2014	2018	26	3.59	74	10.38	0.35	712857	Rural-suburban mix
California	22	2014	2018	34	4.55	84	11.06	0.41	755464	Dense suburban
California	23	2014	2018	45	6.04	103	13.97	0.43	740768	Dense suburban
California	24	2014	2018	45	6.13	114	15.48	0.4	734027	Sparse suburban
California	25	2014	2018	28	3.95	76	10.58	0.37	718950	Dense suburban
California	26	2014	2018	32	4.47	80	11.01	0.41	725953	Dense suburban
California	27	2014	2018	22	3.03	63	8.72	0.35	717944	Urban-suburban mix
California	28	2014	2018	31	4.28	81	11.36	0.38	715011	Pure urban
California	29	2014	2018	18	2.49	56	7.75	0.32	721304	Pure urban
California	30	2014	2018	29	3.82	79	10.29	0.37	764572	Urban-suburban mix
California	31	2014	2018	32	4.32	72	9.62	0.45	744628	Dense suburban
California	32	2014	2018	17	2.42	55	7.62	0.32	719643	Urban-suburban mix
California	33	2014	2018	34	4.81	89	12.46	0.39	713727	Urban-suburban mix
California	34	2014	2018	15	2.12	51	6.97	0.3	729285	Pure urban
California	35	2014	2018	23	3.12	59	7.89	0.4	741990	Urban-suburban mix
California	36	2014	2018	34	4.58	92	12.33	0.37	743337	Dense suburban
California	37	2014	2018	19	2.69	59	8.12	0.33	724002	Pure urban
California	38	2014	2018	18	2.47	56	7.74	0.32	716869	Pure urban
California	39	2014	2018	23	3.17	70	9.62	0.33	727834	Dense suburban
California	40	2014	2018	13	1.88	47	6.56	0.29	711793	Pure urban
California	41	2014	2018	25	3.3	72	9.58	0.34	754152	Dense suburban
California	42	2014	2018	35	4.39	93	11.73	0.37	795401	Sparse suburban
California	43	2014	2018	16	2.25	53	7.22	0.31	727621	Pure urban
California	44	2014	2018	14	1.9	47	6.55	0.29	723072	Pure urban
California	45	2014	2018	28	3.67	86	11.17	0.33	772341	Urban-suburban mix
California	46	2014	2018	15	2.12	59	8.06	0.26	728906	Pure urban
California	47	2014	2018	22	3.09	68	9.46	0.33	714812	Pure urban
California	48	2014	2018	30	4.12	89	12.31	0.33	726516	Urban-suburban mix
California	49	2014	2018	38	5.18	105	14.21	0.36	737614	Dense suburban
California	50	2014	2018	39	5.17	105	14.05	0.37	747793	Dense suburban
California	51	2014	2018	21	2.88	64	8.79	0.33	729654	Urban-suburban mix
California	52	2014	2018	41	5.33	110	14.31	0.37	765158	Urban-suburban mix
California	53	2014	2018	32	4.14	90	11.77	0.35	769137	Urban-suburban mix
Colorado	1	2014	2018	64	7.76	147	17.9	0.43	818722	Urban-suburban mix
Colorado	2	2014	2018	84	10.61	168	21.04	0.5	796438	Sparse suburban
Colorado	3	2014	2018	109	14.73	195	26.34	0.56	739107	Pure rural
Colorado	4	2014	2018	78	9.81	151	18.86	0.52	799390	Rural-suburban mix
Colorado	5	2014	2018	106	13.48	207	26.35	0.51	786912	Dense suburban
Colorado	6	2014	2018	69	8.51	142	17.66	0.48	805844	Dense suburban
Colorado	7	2014	2018	70	8.93	148	18.91	0.47	784728	Dense suburban
Connecticut	1	2014	2018	19	2.65	74	10.43	0.25	713076	Sparse suburban
Connecticut	2	2014	2018	30	4.3	98	13.85	0.31	705024	Rural-suburban mix
Connecticut	3	2014	2018	25	3.45	83	11.62	0.3	715728	Sparse suburban
Connecticut	4	2014	2018	16	2.23	61	8.28	0.27	735915	Sparse suburban
Connecticut	5	2014	2018	25	3.44	80	11.27	0.31	711761	Sparse suburban
Delaware	At large	2014	2018	57	6.05	118	12.47	0.48	949495	Sparse suburban
District of Columbia	At large	2014	2018	<10	<1.5	45	6.63	<25%	684498	Pure urban
Florida	1	2014	2018	89	11.76	150	19.75	0.6	759701	Rural-suburban mix
Florida	2	2014	2018	91	12.59	149	20.65	0.61	719213	Rural-suburban mix
Florida	3	2014	2018	72	9.89	127	17.47	0.57	728979	Pure rural
Florida	4	2014	2018	87	11.13	148	18.95	0.59	780575	Sparse suburban
Florida	5	2014	2018	52	7.07	91	12.43	0.57	729038	Sparse suburban
Florida	6	2014	2018	91	12.05	167	22.13	0.54	753500	Sparse suburban
Florida	7	2014	2018	48	6.38	97	12.79	0.5	757809	Sparse suburban
Florida	8	2014	2018	88	11.87	162	21.88	0.54	742230	Sparse suburban
Florida	9	2014	2018	49	5.8	97	11.64	0.5	837026	Sparse suburban
Florida	10	2014	2018	35	4.38	80	9.86	0.44	808969	Sparse suburban
Florida	11	2014	2018	94	12.4	154	20.44	0.61	754649	Rural-suburban mix
Florida	12	2014	2018	84	11.15	161	21.24	0.52	757719	Sparse suburban
Florida	13	2014	2018	76	10.45	150	20.7	0.5	723658	Dense suburban
Florida	14	2014	2018	52	6.79	104	13.64	0.5	763832	Dense suburban
Florida	15	2014	2018	61	7.8	117	15	0.52	777638	Sparse suburban
Florida	16	2014	2018	77	9.56	145	17.99	0.53	804662	Sparse suburban
Florida	17	2014	2018	84	11.14	148	19.54	0.57	756549	Rural-suburban mix
Florida	18	2014	2018	66	8.68	134	17.71	0.49	757228	Sparse suburban
Florida	19	2014	2018	72	9.07	136	17	0.53	797066	Sparse suburban
Florida	20	2014	2018	33	4.22	73	9.38	0.45	778060	Urban-suburban mix
Florida	21	2014	2018	53	6.95	123	16.13	0.43	762765	Dense suburban
Florida	22	2014	2018	52	6.95	117	15.65	0.44	750149	Dense suburban
Florida	23	2014	2018	43	5.73	97	12.84	0.45	756127	Urban-suburban mix
Florida	24	2014	2018	30	4.04	71	9.43	0.43	750906	Urban-suburban mix
Florida	25	2014	2018	36	4.66	77	10.13	0.46	763720	Urban-suburban mix
Florida	26	2014	2018	39	4.99	85	10.91	0.46	774375	Urban-suburban mix
Florida	27	2014	2018	35	4.61	80	10.62	0.43	751996	Urban-suburban mix
Georgia	1	2014	2018	72	9.83	118	16.17	0.61	731698	Rural-suburban mix
Georgia	2	2014	2018	63	9.37	91	13.43	0.7	675246	Rural-suburban mix
Georgia	3	2014	2018	67	9.23	107	14.67	0.63	728046	Rural-suburban mix
Georgia	4	2014	2018	42	5.62	71	9.52	0.59	748744	Sparse suburban
Georgia	5	2014	2018	39	5.14	73	9.66	0.53	759756	Dense suburban
Georgia	6	2014	2018	51	6.85	95	12.7	0.54	744905	Dense suburban
Georgia	7	2014	2018	51	6.43	94	11.81	0.54	793740	Sparse suburban
Georgia	8	2014	2018	72	10.19	107	15.16	0.67	704814	Pure rural
Georgia	9	2014	2018	97	13.18	145	19.68	0.67	735832	Pure rural
Georgia	10	2014	2018	74	9.97	115	15.56	0.64	740458	Pure rural
Georgia	11	2014	2018	66	8.72	108	14.35	0.61	756192	Sparse suburban
Georgia	12	2014	2018	66	9.13	102	14.14	0.65	718746	Pure rural
Georgia	13	2014	2018	44	5.91	76	10.16	0.58	749389	Sparse suburban
Georgia	14	2014	2018	73	10.31	111	15.69	0.66	709918	Rural-suburban mix
Hawaii	1	2014	2018	12	1.65	79	11.18	0.15	710707	Urban-suburban mix
Hawaii	2	2014	2018	23	3.24	117	16.44	0.2	711322	Rural-suburban mix
Idaho	1	2014	2018	114	13.12	186	21.43	0.61	869560	Rural-suburban mix
Idaho	2	2014	2018	108	13.17	184	22.51	0.59	818249	Rural-suburban mix
Illinois	1	2014	2018	18	2.58	57	8	0.32	708118	Urban-suburban mix
Illinois	2	2014	2018	18	2.54	53	7.58	0.33	703782	Dense suburban
Illinois	3	2014	2018	23	3.14	72	9.97	0.31	717897	Urban-suburban mix
Illinois	4	2014	2018	17	2.41	51	7.33	0.33	699621	Pure urban
Illinois	5	2014	2018	23	3.14	75	10.1	0.31	740075	Pure urban
Illinois	6	2014	2018	25	3.45	77	10.58	0.33	727847	Sparse suburban
Illinois	7	2014	2018	17	2.32	52	7.2	0.32	724652	Pure urban
Illinois	8	2014	2018	20	2.85	66	9.23	0.31	715095	Dense suburban
Illinois	9	2014	2018	23	3.12	73	10.02	0.31	723507	Urban-suburban mix
Illinois	10	2014	2018	22	3.08	68	9.59	0.32	712819	Sparse suburban
Illinois	11	2014	2018	20	2.78	66	9.14	0.3	722593	Dense suburban
Illinois	12	2014	2018	57	8.14	104	14.95	0.54	697270	Rural-suburban mix
Illinois	13	2014	2018	41	5.81	100	14.22	0.41	704851	Rural-suburban mix
Illinois	14	2014	2018	28	3.77	81	10.98	0.34	735045	Sparse suburban
Illinois	15	2014	2018	46	6.64	113	16.18	0.41	696632	Pure rural
Illinois	16	2014	2018	42	6.1	105	15.14	0.4	695502	Rural-suburban mix
Illinois	17	2014	2018	36	5.3	103	14.93	0.35	688356	Rural-suburban mix
Illinois	18	2014	2018	45	6.38	109	15.45	0.41	707835	Rural-suburban mix
Indiana	1	2014	2018	59	8.22	105	14.71	0.56	715348	Sparse suburban
Indiana	2	2014	2018	55	7.67	101	13.94	0.55	722805	Rural-suburban mix
Indiana	3	2014	2018	51	6.94	100	13.5	0.51	739773	Rural-suburban mix
Indiana	4	2014	2018	67	8.92	118	15.7	0.57	750717	Rural-suburban mix
Indiana	5	2014	2018	60	7.82	114	14.86	0.53	767053	Sparse suburban
Indiana	6	2014	2018	77	10.68	130	18.06	0.59	718706	Pure rural
Indiana	7	2014	2018	57	7.61	110	14.58	0.52	755358	Dense suburban
Indiana	8	2014	2018	77	10.77	138	19.18	0.56	719671	Rural-suburban mix
Indiana	9	2014	2018	67	9.01	118	15.78	0.57	747995	Rural-suburban mix
Iowa	1	2014	2018	50	6.53	112	14.46	0.45	772171	Rural-suburban mix
Iowa	2	2014	2018	56	7.22	123	15.78	0.46	780050	Rural-suburban mix
Iowa	3	2014	2018	53	6.48	122	14.88	0.44	822826	Sparse suburban
Iowa	4	2014	2018	50	6.56	106	14.01	0.47	757452	Pure rural
Kansas	1	2014	2018	63	8.93	124	17.55	0.51	708511	Pure rural
Kansas	2	2014	2018	70	9.82	134	18.71	0.53	714992	Pure rural
Kansas	3	2014	2018	57	7.45	123	16.09	0.46	762091	Dense suburban
Kansas	4	2014	2018	70	9.63	135	18.69	0.52	723182	Sparse suburban
Kentucky	1	2014	2018	91	12.63	144	20.01	0.63	720226	Pure rural
Kentucky	2	2014	2018	90	11.94	144	19.07	0.63	753608	Pure rural
Kentucky	3	2014	2018	69	9.24	124	16.63	0.56	745082	Dense suburban
Kentucky	4	2014	2018	73	9.69	119	15.75	0.62	753376	Rural-suburban mix
Kentucky	5	2014	2018	95	13.59	131	18.65	0.73	702070	Pure rural
Kentucky	6	2014	2018	73	9.55	115	14.98	0.64	765842	Rural-suburban mix
Louisiana	1	2014	2018	83	10.38	140	17.41	0.6	801089	Rural-suburban mix
Louisiana	2	2014	2018	49	6.15	87	11.04	0.56	789120	Dense suburban
Louisiana	3	2014	2018	82	10.42	125	15.98	0.65	783013	Rural-suburban mix
Louisiana	4	2014	2018	87	11.49	126	16.76	0.69	753519	Pure rural
Louisiana	5	2014	2018	78	10.38	118	15.74	0.66	747722	Pure rural
Louisiana	6	2014	2018	78	9.93	116	14.74	0.67	789153	Rural-suburban mix
Maine	1	2014	2018	56	8.19	113	16.7	0.49	679024	Rural-suburban mix
Maine	2	2014	2018	74	11.28	132	20.15	0.56	653789	Pure rural
Maryland	1	2014	2018	50	6.88	102	13.9	0.5	730442	Rural-suburban mix
Maryland	2	2014	2018	32	4.24	77	10.05	0.42	762351	Dense suburban
Maryland	3	2014	2018	31	4.1	82	10.83	0.38	756296	Dense suburban
Maryland	4	2014	2018	23	3.03	57	7.58	0.4	749033	Dense suburban
Maryland	5	2014	2018	38	5.05	77	10.12	0.5	760819	Sparse suburban
Maryland	6	2014	2018	38	4.94	82	10.77	0.46	765910	Sparse suburban
Maryland	7	2014	2018	22	3.02	59	8.16	0.37	719951	Urban-suburban mix
Maryland	8	2014	2018	27	3.57	72	9.52	0.38	758633	Dense suburban
Massachusetts	1	2014	2018	22	3.02	81	11.09	0.27	730959	Sparse suburban
Massachusetts	2	2014	2018	20	2.7	74	9.85	0.27	747493	Rural-suburban mix
Massachusetts	3	2014	2018	13	1.71	70	9.16	0.19	763936	Sparse suburban
Massachusetts	4	2014	2018	16	2.17	80	10.66	0.2	754622	Sparse suburban
Massachusetts	5	2014	2018	10	1.29	68	8.86	0.15	766241	Urban-suburban mix
Massachusetts	6	2014	2018	15	1.93	75	9.79	0.2	767907	Sparse suburban
Massachusetts	7	2014	2018	<10	<1.5	50	6.26	<25%	795850	Pure urban
Massachusetts	8	2014	2018	12	1.53	64	8.41	0.18	764581	Dense suburban
Massachusetts	9	2014	2018	20	2.7	94	12.79	0.21	738604	Sparse suburban
Michigan	1	2014	2018	66	9.43	135	19.35	0.49	699432	Pure rural
Michigan	2	2014	2018	43	5.89	97	13.24	0.45	735626	Rural-suburban mix
Michigan	3	2014	2018	48	6.45	107	14.48	0.45	737911	Rural-suburban mix
Michigan	4	2014	2018	65	9.34	112	16.04	0.58	701141	Pure rural
Michigan	5	2014	2018	54	7.96	101	14.84	0.54	679543	Sparse suburban
Michigan	6	2014	2018	58	8.06	111	15.44	0.52	716503	Rural-suburban mix
Michigan	7	2014	2018	56	7.99	109	15.39	0.52	705518	Pure rural
Michigan	8	2014	2018	49	6.72	103	14.05	0.48	736078	Sparse suburban
Michigan	9	2014	2018	47	6.59	105	14.61	0.45	718682	Dense suburban
Michigan	10	2014	2018	60	8.33	116	16.13	0.52	717176	Rural-suburban mix
Michigan	11	2014	2018	47	6.44	100	13.67	0.47	727670	Sparse suburban
Michigan	12	2014	2018	43	6.06	90	12.64	0.48	711209	Dense suburban
Michigan	13	2014	2018	37	5.38	73	10.68	0.5	679044	Dense suburban
Michigan	14	2014	2018	33	4.73	68	9.86	0.48	691955	Dense suburban
Minnesota	1	2014	2018	44	6.48	87	12.96	0.5	672649	Rural-suburban mix
Minnesota	2	2014	2018	37	5.28	83	11.85	0.45	698522	Sparse suburban
Minnesota	3	2014	2018	31	4.36	84	11.81	0.37	710378	Sparse suburban
Minnesota	4	2014	2018	35	4.93	91	12.85	0.38	706259	Dense suburban
Minnesota	5	2014	2018	27	3.79	77	10.86	0.35	707352	Urban-suburban mix
Minnesota	6	2014	2018	45	6.36	95	13.51	0.47	702583	Rural-suburban mix
Minnesota	7	2014	2018	46	6.98	97	14.57	0.48	664941	Pure rural
Minnesota	8	2014	2018	61	9.11	126	18.91	0.48	664674	Pure rural
Mississippi	1	2014	2018	76	9.95	110	14.44	0.69	760715	Pure rural
Mississippi	2	2014	2018	56	7.91	79	11.13	0.71	711716	Pure rural
Mississippi	3	2014	2018	72	9.54	103	13.69	0.7	749199	Pure rural
Mississippi	4	2014	2018	87	11.3	135	17.6	0.64	767132	Rural-suburban mix
Missouri	1	2014	2018	47	6.4	90	12.29	0.52	732537	Dense suburban
Missouri	2	2014	2018	67	8.82	123	16.07	0.55	763266	Dense suburban
Missouri	3	2014	2018	89	11.43	149	19.09	0.6	782693	Rural-suburban mix
Missouri	4	2014	2018	91	11.95	147	19.15	0.62	765070	Pure rural
Missouri	5	2014	2018	75	9.81	141	18.4	0.53	764511	Dense suburban
Missouri	6	2014	2018	88	11.4	155	20.1	0.57	768533	Rural-suburban mix
Missouri	7	2014	2018	95	12.24	170	21.97	0.56	773182	Rural-suburban mix
Missouri	8	2014	2018	95	12.87	157	21.15	0.61	740270	Pure rural
Montana	At large	2014	2018	172	16.47	273	26.19	0.63	1041732	Pure rural
Nebraska	1	2014	2018	43	6.75	90	13.98	0.48	641533	Rural-suburban mix
Nebraska	2	2014	2018	35	5.28	75	11.41	0.46	659795	Dense suburban
Nebraska	3	2014	2018	43	7.11	87	14.46	0.49	603432	Pure rural
Nevada	1	2014	2018	64	9.25	128	18.59	0.5	689384	Urban-suburban mix
Nevada	2	2014	2018	99	14.03	175	24.69	0.57	708357	Rural-suburban mix
Nevada	3	2014	2018	82	10.44	160	20.34	0.51	785285	Urban-suburban mix
Nevada	4	2014	2018	77	10.45	150	20.21	0.52	739823	Urban-suburban mix
New Hampshire	1	2014	2018	58	8.51	123	18.11	0.47	677001	Rural-suburban mix
New Hampshire	2	2014	2018	62	9.37	130	19.53	0.48	666621	Pure rural
New Jersey	1	2014	2018	19	2.63	77	10.61	0.25	726200	Dense suburban
New Jersey	2	2014	2018	29	3.96	84	11.72	0.34	719651	Rural-suburban mix
New Jersey	3	2014	2018	25	3.34	78	10.62	0.31	735635	Sparse suburban
New Jersey	4	2014	2018	17	2.24	69	9.36	0.24	739922	Sparse suburban
New Jersey	5	2014	2018	17	2.28	71	9.62	0.24	737642	Dense suburban
New Jersey	6	2014	2018	11	1.53	59	8.03	0.19	736045	Dense suburban
New Jersey	7	2014	2018	19	2.52	67	9	0.28	739893	Sparse suburban
New Jersey	8	2014	2018	10	1.32	49	6.43	0.21	760952	Pure urban
New Jersey	9	2014	2018	11	1.46	50	6.66	0.22	751755	Pure urban
New Jersey	10	2014	2018	<10	<1.5	42	5.61	<25%	749828	Pure urban
New Jersey	11	2014	2018	17	2.33	63	8.62	0.27	735773	Sparse suburban
New Jersey	12	2014	2018	12	1.56	56	7.52	0.21	748549	Dense suburban
New Mexico	1	2014	2018	82	11.82	159	22.89	0.52	695519	Dense suburban
New Mexico	2	2014	2018	92	13.18	158	22.53	0.59	700177	Rural-suburban mix
New Mexico	3	2014	2018	85	12.25	173	24.83	0.49	696738	Pure rural
New York	1	2014	2018	20	2.73	68	9.51	0.29	717383	Sparse suburban
New York	2	2014	2018	16	2.19	59	8.18	0.27	715030	Dense suburban
New York	3	2014	2018	14	1.94	58	8.02	0.24	727480	Dense suburban
New York	4	2014	2018	11	1.57	50	6.87	0.23	722626	Urban-suburban mix
New York	5	2014	2018	<10	<1.5	41	5.36	<25%	772342	Pure urban
New York	6	2014	2018	<10	<1.5	51	6.94	<25%	732433	Pure urban
New York	7	2014	2018	<10	<1.5	42	5.75	<25%	734208	Pure urban
New York	8	2014	2018	<10	<1.5	37	4.77	<25%	771343	Pure urban
New York	9	2014	2018	<10	<1.5	38	5.15	<25%	733271	Pure urban
New York	10	2014	2018	<10	<1.5	59	8.01	<25%	730760	Pure urban
New York	11	2014	2018	<10	<1.5	50	6.83	<25%	730634	Pure urban
New York	12	2014	2018	<10	<1.5	63	8.82	<25%	719072	Pure urban
New York	13	2014	2018	<10	<1.5	47	6.12	<25%	774528	Pure urban
New York	14	2014	2018	<10	<1.5	47	6.68	<25%	705681	Pure urban
New York	15	2014	2018	<10	<1.5	38	5.15	<25%	744647	Pure urban
New York	16	2014	2018	<10	<1.5	48	6.41	<25%	741586	Pure urban
New York	17	2014	2018	13	1.72	53	7.19	0.24	738481	Sparse suburban
New York	18	2014	2018	26	3.55	68	9.42	0.38	721629	Rural-suburban mix
New York	19	2014	2018	40	5.73	101	14.4	0.4	700993	Pure rural
New York	20	2014	2018	25	3.43	78	10.69	0.32	725925	Sparse suburban
New York	21	2014	2018	40	5.71	89	12.56	0.45	706791	Pure rural
New York	22	2014	2018	36	5.1	86	12.29	0.42	699564	Rural-suburban mix
New York	23	2014	2018	39	5.57	96	13.75	0.4	699965	Pure rural
New York	24	2014	2018	25	3.49	78	11.04	0.32	707425	Rural-suburban mix
New York	25	2014	2018	21	2.95	70	9.82	0.3	717362	Sparse suburban
New York	26	2014	2018	22	3.15	81	11.45	0.27	711502	Urban-suburban mix
New York	27	2014	2018	34	4.75	94	13.1	0.36	715792	Pure rural
North Carolina	1	2014	2018	49	6.47	84	11.21	0.58	753591	Rural-suburban mix
North Carolina	2	2014	2018	54	6.56	99	12.08	0.54	822252	Rural-suburban mix
North Carolina	3	2014	2018	75	9.93	133	17.58	0.57	754824	Pure rural
North Carolina	4	2014	2018	34	4.1	77	9.18	0.45	840168	Sparse suburban
North Carolina	5	2014	2018	68	9.05	123	16.32	0.55	752439	Rural-suburban mix
North Carolina	6	2014	2018	69	9.03	114	15.01	0.6	762671	Rural-suburban mix
North Carolina	7	2014	2018	61	7.7	107	13.54	0.57	787034	Pure rural
North Carolina	8	2014	2018	72	9.3	120	15.37	0.6	779035	Pure rural
North Carolina	9	2014	2018	57	7.27	99	12.65	0.57	779186	Sparse suburban
North Carolina	10	2014	2018	74	9.86	137	18.16	0.54	753325	Rural-suburban mix
North Carolina	11	2014	2018	89	11.85	153	20.34	0.58	752316	Pure rural
North Carolina	12	2014	2018	40	4.68	81	9.6	0.49	847254	Sparse suburban
North Carolina	13	2014	2018	62	8.09	110	14.21	0.57	771529	Rural-suburban mix
North Dakota	At large	2014	2018	81	10.74	140	18.64	0.58	752201	Rural-suburban mix
Ohio	1	2014	2018	46	6.17	92	12.44	0.5	737765	Sparse suburban
Ohio	2	2014	2018	60	8.19	109	15	0.55	728702	Rural-suburban mix
Ohio	3	2014	2018	44	5.56	90	11.5	0.48	785158	Dense suburban
Ohio	4	2014	2018	59	8.27	110	15.47	0.53	711251	Rural-suburban mix
Ohio	5	2014	2018	55	7.56	106	14.71	0.51	722734	Rural-suburban mix
Ohio	6	2014	2018	75	10.69	125	17.82	0.6	700099	Pure rural
Ohio	7	2014	2018	61	8.39	113	15.49	0.54	726547	Rural-suburban mix
Ohio	8	2014	2018	56	7.74	105	14.4	0.54	728116	Rural-suburban mix
Ohio	9	2014	2018	49	6.96	101	14.18	0.49	709760	Dense suburban
Ohio	10	2014	2018	57	7.94	109	15.05	0.53	721945	Sparse suburban
Ohio	11	2014	2018	38	5.5	79	11.32	0.49	693817	Urban-suburban mix
Ohio	12	2014	2018	57	7.38	106	13.73	0.54	770907	Sparse suburban
Ohio	13	2014	2018	59	8.37	117	16.53	0.51	710422	Sparse suburban
Ohio	14	2014	2018	56	7.85	115	16.04	0.49	717865	Sparse suburban
Ohio	15	2014	2018	56	7.39	106	14.1	0.52	754510	Rural-suburban mix
Ohio	16	2014	2018	56	7.81	113	15.69	0.5	722281	Sparse suburban
Oklahoma	1	2014	2018	90	11.26	155	19.47	0.58	797151	Sparse suburban
Oklahoma	2	2014	2018	98	13.11	171	22.91	0.57	748286	Pure rural
Oklahoma	3	2014	2018	101	12.96	157	20.23	0.64	776845	Pure rural
Oklahoma	4	2014	2018	87	11.15	152	19.4	0.57	783867	Rural-suburban mix
Oklahoma	5	2014	2018	85	10.47	147	18.08	0.58	811988	Dense suburban
Oregon	1	2014	2018	63	7.58	130	15.62	0.48	832139	Dense suburban
Oregon	2	2014	2018	112	13.92	193	23.99	0.58	805737	Rural-suburban mix
Oregon	3	2014	2018	59	7.14	141	16.99	0.42	830995	Urban-suburban mix
Oregon	4	2014	2018	106	13.3	190	23.88	0.56	794776	Rural-suburban mix
Oregon	5	2014	2018	72	8.75	142	17.36	0.5	818296	Dense suburban
Pennsylvania	1	2014	2018	40	5.58	97	13.72	0.41	709207	Sparse suburban
Pennsylvania	2	2014	2018	27	3.64	79	10.71	0.34	734861	Pure urban
Pennsylvania	3	2014	2018	23	3.19	68	9.46	0.34	722979	Pure urban
Pennsylvania	4	2014	2018	40	5.47	98	13.5	0.41	724647	Sparse suburban
Pennsylvania	5	2014	2018	29	4.07	94	13.21	0.31	714120	Urban-suburban mix
Pennsylvania	6	2014	2018	42	5.82	95	13.06	0.45	725593	Sparse suburban
Pennsylvania	7	2014	2018	58	8	126	17.47	0.46	722048	Sparse suburban
Pennsylvania	8	2014	2018	73	10.46	136	19.56	0.54	695547	Rural-suburban mix
Pennsylvania	9	2014	2018	74	10.52	132	18.67	0.56	705114	Pure rural
Pennsylvania	10	2014	2018	57	7.8	113	15.55	0.5	727144	Sparse suburban
Pennsylvania	11	2014	2018	54	7.45	100	13.77	0.54	728820	Sparse suburban
Pennsylvania	12	2014	2018	68	9.67	119	16.99	0.57	701191	Pure rural
Pennsylvania	13	2014	2018	67	9.58	112	16.09	0.6	698730	Pure rural
Pennsylvania	14	2014	2018	74	10.77	125	18.02	0.6	691459	Rural-suburban mix
Pennsylvania	15	2014	2018	75	11.01	123	17.89	0.62	685714	Pure rural
Pennsylvania	16	2014	2018	65	9.45	119	17.16	0.55	692426	Rural-suburban mix
Pennsylvania	17	2014	2018	51	7.22	108	15.21	0.48	711725	Sparse suburban
Pennsylvania	18	2014	2018	44	6.26	103	14.65	0.43	699856	Urban-suburban mix
Rhode Island	1	2014	2018	13	2.41	58	10.92	0.22	532760	Urban-suburban mix
Rhode Island	2	2014	2018	16	3.1	62	11.78	0.26	523851	Sparse suburban
South Carolina	1	2014	2018	67	8.7	116	15.13	0.58	766664	Sparse suburban
South Carolina	2	2014	2018	78	10.95	123	17.37	0.63	707819	Rural-suburban mix
South Carolina	3	2014	2018	83	12.14	131	19.08	0.64	684952	Pure rural
South Carolina	4	2014	2018	74	10.24	122	16.97	0.6	718032	Sparse suburban
South Carolina	5	2014	2018	73	10.32	111	15.73	0.66	706085	Pure rural
South Carolina	6	2014	2018	55	8.32	86	13.03	0.64	662894	Pure rural
South Carolina	7	2014	2018	77	10.91	111	15.62	0.7	709479	Rural-suburban mix
South Dakota	At large	2014	2018	81	9.42	167	19.3	0.49	864289	Pure rural
Tennessee	1	2014	2018	80	11.16	136	19	0.59	713768	Rural-suburban mix
Tennessee	2	2014	2018	74	10.06	127	17.24	0.58	738722	Rural-suburban mix
Tennessee	3	2014	2018	76	10.46	132	18.17	0.58	726454	Rural-suburban mix
Tennessee	4	2014	2018	76	9.9	126	16.36	0.61	769786	Rural-suburban mix
Tennessee	5	2014	2018	61	8.04	115	14.98	0.54	765122	Sparse suburban
Tennessee	6	2014	2018	102	13.46	157	20.63	0.65	759176	Pure rural
Tennessee	7	2014	2018	83	10.83	136	17.76	0.61	764797	Pure rural
Tennessee	8	2014	2018	76	10.73	118	16.63	0.65	708031	Rural-suburban mix
Tennessee	9	2014	2018	38	5.37	60	8.51	0.63	705233	Dense suburban
Texas	1	2014	2018	77	10.66	121	16.82	0.63	718215	Pure rural
Texas	2	2014	2018	57	7.29	97	12.33	0.59	785386	Dense suburban
Texas	3	2014	2018	50	5.98	91	10.82	0.55	842866	Dense suburban
Texas	4	2014	2018	85	11.55	136	18.46	0.63	738929	Pure rural
Texas	5	2014	2018	70	9.4	121	16.22	0.58	744338	Rural-suburban mix
Texas	6	2014	2018	60	7.76	101	13.13	0.59	773108	Dense suburban
Texas	7	2014	2018	55	6.95	93	11.84	0.59	785024	Urban-suburban mix
Texas	8	2014	2018	75	8.96	127	15.29	0.59	832589	Rural-suburban mix
Texas	9	2014	2018	33	4.21	61	7.85	0.54	781992	Urban-suburban mix
Texas	10	2014	2018	62	7.4	109	12.99	0.57	839780	Rural-suburban mix
Texas	11	2014	2018	75	9.81	123	16.14	0.61	764038	Rural-suburban mix
Texas	12	2014	2018	68	8.63	114	14.41	0.6	793259	Sparse suburban
Texas	13	2014	2018	78	10.96	143	20.1	0.55	710847	Rural-suburban mix
Texas	14	2014	2018	68	9.04	113	15.12	0.6	747166	Sparse suburban
Texas	15	2014	2018	31	3.95	62	8.01	0.49	776971	Sparse suburban
Texas	16	2014	2018	41	5.62	75	10.23	0.55	737368	Dense suburban
Texas	17	2014	2018	53	6.99	94	12.35	0.57	764593	Rural-suburban mix
Texas	18	2014	2018	36	4.67	66	8.54	0.55	776383	Dense suburban
Texas	19	2014	2018	68	9.32	121	16.62	0.56	725504	Rural-suburban mix
Texas	20	2014	2018	44	5.54	88	11.02	0.5	798543	Dense suburban
Texas	21	2014	2018	79	9.92	133	16.66	0.6	795908	Dense suburban
Texas	22	2014	2018	56	6.41	96	10.91	0.59	880197	Sparse suburban
Texas	23	2014	2018	47	6.24	89	11.74	0.53	760106	Rural-suburban mix
Texas	24	2014	2018	55	6.99	98	12.41	0.56	789219	Dense suburban
Texas	25	2014	2018	71	9.25	125	16.26	0.57	768407	Rural-suburban mix
Texas	26	2014	2018	58	6.84	100	11.74	0.58	848154	Sparse suburban
Texas	27	2014	2018	67	9.09	112	15.22	0.6	737102	Rural-suburban mix
Texas	28	2014	2018	35	4.64	66	8.81	0.53	750331	Sparse suburban
Texas	29	2014	2018	33	4.47	62	8.35	0.54	745389	Dense suburban
Texas	30	2014	2018	31	4.05	64	8.25	0.49	776026	Dense suburban
Texas	31	2014	2018	79	9.48	124	14.98	0.63	829808	Sparse suburban
Texas	32	2014	2018	56	7.29	102	13.31	0.55	764700	Dense suburban
Texas	33	2014	2018	32	4.28	63	8.48	0.5	736783	Dense suburban
Texas	34	2014	2018	32	4.4	67	9.29	0.47	722603	Rural-suburban mix
Texas	35	2014	2018	43	5.29	86	10.68	0.5	806895	Dense suburban
Texas	36	2014	2018	73	9.96	122	16.55	0.6	736668	Rural-suburban mix
Utah	1	2014	2018	80	10.63	161	21.37	0.5	751772	Sparse suburban
Utah	2	2014	2018	85	11.26	166	21.99	0.51	752756	Rural-suburban mix
Utah	3	2014	2018	73	9.7	139	18.6	0.52	749828	Sparse suburban
Utah	4	2014	2018	76	9.64	161	20.3	0.47	790994	Dense suburban
Vermont	At large	2014	2018	64	10.21	116	18.56	0.55	624977	Pure rural
Virginia	1	2014	2018	63	8.07	111	14.18	0.57	785774	Rural-suburban mix
Virginia	2	2014	2018	58	7.79	99	13.39	0.58	738568	Dense suburban
Virginia	3	2014	2018	55	7.49	94	12.72	0.59	738833	Dense suburban
Virginia	4	2014	2018	55	7.13	103	13.45	0.53	765419	Rural-suburban mix
Virginia	5	2014	2018	74	10.04	118	16.02	0.63	734216	Pure rural
Virginia	6	2014	2018	84	11.18	137	18.28	0.61	750774	Rural-suburban mix
Virginia	7	2014	2018	66	8.45	113	14.55	0.58	777354	Rural-suburban mix
Virginia	8	2014	2018	27	3.39	67	8.49	0.4	792945	Urban-suburban mix
Virginia	9	2014	2018	84	11.8	140	19.62	0.6	711468	Pure rural
Virginia	10	2014	2018	52	6.25	103	12.44	0.5	826914	Sparse suburban
Virginia	11	2014	2018	28	3.58	70	8.79	0.41	791509	Dense suburban
Washington	1	2014	2018	52	6.97	113	15.2	0.46	742135	Sparse suburban
Washington	2	2014	2018	55	7.57	117	15.96	0.47	730430	Dense suburban
Washington	3	2014	2018	65	9.08	132	18.32	0.5	719101	Rural-suburban mix
Washington	4	2014	2018	58	8	104	14.44	0.55	719814	Rural-suburban mix
Washington	5	2014	2018	71	10.12	138	19.63	0.52	705266	Rural-suburban mix
Washington	6	2014	2018	71	10.14	148	21.22	0.48	698764	Rural-suburban mix
Washington	7	2014	2018	41	5.37	100	12.99	0.41	768042	Urban-suburban mix
Washington	8	2014	2018	52	7.02	114	15.52	0.45	737080	Sparse suburban
Washington	9	2014	2018	35	4.7	87	11.79	0.4	738464	Dense suburban
Washington	10	2014	2018	64	8.73	134	18.22	0.48	735240	Dense suburban
West Virginia	1	2014	2018	78	12.66	121	19.62	0.65	614325	Pure rural
West Virginia	2	2014	2018	83	13.35	129	20.7	0.64	623350	Pure rural
West Virginia	3	2014	2018	81	13.68	126	21.23	0.64	591379	Pure rural
Wisconsin	1	2014	2018	50	7.02	111	15.42	0.46	717432	Sparse suburban
Wisconsin	2	2014	2018	47	6.29	106	14.05	0.45	754999	Rural-suburban mix
Wisconsin	3	2014	2018	58	8.11	118	16.35	0.5	719855	Pure rural
Wisconsin	4	2014	2018	34	4.72	79	11.05	0.43	713066	Urban-suburban mix
Wisconsin	5	2014	2018	49	6.84	103	14.23	0.48	723040	Sparse suburban
Wisconsin	6	2014	2018	54	7.5	114	16.03	0.47	713439	Rural-suburban mix
Wisconsin	7	2014	2018	67	9.4	124	17.5	0.54	708307	Pure rural
Wisconsin	8	2014	2018	57	7.82	119	16.31	0.48	728256	Rural-suburban mix
Wyoming	At large	2014	2018	93	16.05	145	24.92	0.64	581836	Pure rural
